# Supplementary material for: Acceptability of newborn screening for Spinal Muscular Atrophy: views of the UK public, screened families, health professionals and SMA community
Source: Research Square preprint supplement (doi:10.21203/rs.3.rs-8881933/v1), 2026-02-23
Supplement: Supplementary file 1 [file 79bd1630c1a15b5f862624eb.docx]

**Supplementary Tables**

**S1. Qualitative (Interview) Participant Characteristics (names changed to protect anonymity)**

**S1.1. General Public**

| **Name** | **Gender** | **Age** | **Ethnicity** | **Religion** | **Parent (number of children)** | **Supports Screening** |
| --- | --- | --- | --- | --- | --- | --- |
| Agnieszka | Female | 29 | White European | Christian (Catholic) | Yes (3) | Yes |
| Eilidh | Female | 37 | White British | Christian | Yes (6) | Yes |
| Evan | Male | 81 | White British | Christian (Protestant) | Yes (3) | Yes |
| Hafsa | Female | 28 | Pakistani | Muslim | Yes (1) | Yes |
| Helen | Female | 46 | White British | None | Yes (3) | Yes |
| Israa | Female | Unavailable | White (other-mixed) | None | Yes (1) | Yes |
| Nusrat | Female | 42 | Bangladeshi | Muslim | Yes (3) | Undecided |
| Sarah | Female | 32 | White British | None | Yes (3) | Yes |
| Sue | Female | 65 | White British | Christian (Protestant) | No | Undecided |
| William | Male | 46 | White British | None | No | Yes |

**S1.2. Participants with Experience of Type I SMA**

| **Name** | **Gender** | **Age** | **Ethnicity** | **Religion** | **Age of children with SMA** | **Treated** |
| --- | --- | --- | --- | --- | --- | --- |
| Alexis | Female | Unavailable | Unavailable | Unavailable | 3 years | Spinraza then Zolgensma |
| Aoife | Female | 33 | White Irish | Catholic | 6 years  2 years (diagnosed prenatally) | Spinraza then Zolgensma  Spinraza then Zolgensma |
| Chloe | Female | 36 | Unavailable | Unavailable | 22 months | Spinraza |
| Hailey (partner of James) | Female | 36 | Unavailable | Unavailable | Lost child with SMA age 1 year | No |
| James (partner of Hailey) | Male | 35 | Unavailable | Unavailable | Lost child with SMA age 1 year | No |
| Tara | Female | 37 | Unavailable | Unavailable | 2 years | Spinraza then Zolgensma |
| Claire | Female | 35 | White British | None | 2 years | Zolgensma |

**S1.3. Participants with Experience of Type II SMA**

| **Name** | **Gender** | **Age** | **Ethnicity** | **Religion** | **Relationship to SMA** | **Treatment** |
| --- | --- | --- | --- | --- | --- | --- |
| Henry | Male | Unavailable | Unavailable | Unavailable | Parent (20 month old child) | Risdiplam |
| Jyoti | Female | 49 | British Asian | None | Affected | Risdiplam |
| Louise | Female | 58 | White British | Catholic | Affected | Spinraza |
| Simon (partner of Vicki) | Male | 30 | White British | None | Parent  Child 1 (3 years)  Child 2 (15 months) | Spinraza  Zolgensma |
| Vicki (partner of Simon) | Female | 35 | White British | None | Parent (see above) |  |
| Yana | Female | 30 | White European | None | Affected | Risdiplam |

**S1.4. Participants with Experience of Type III SMA**

| **Name** | **Gender** | **Age (years)** | **Ethnicity** | **Religion** | **Relationship to SMA** | **Age diagnosed** | **Treatment** |
| --- | --- | --- | --- | --- | --- | --- | --- |
| Nathan | Male | 27 | Unavailable | Unavailable | Affected | 9 years | Spinraza |
| Jane (married to Lee) | Female | 62 | Unavailable | Unavailable | Parent of 27 year old with type III | 8 years | Spinraza |
| Lee (married to Jane) | Male | 62 | Unavailable | Unavailable | Parent of 27 year old with type III | 8 years | Spinraza |
| Phillip | Male | 34 | White Irish/ White British | Catholic | Affected | 3 years | None |
| Rhiannon | Female | 44 | White British | None | Affected | 18 months | Risdiplam |

**S1.5. Participants with Experience of Type IV SMA**

| **Name** | **Gender** | **Age** | **Ethnicity** | **Religion** | **Age at Diagnosis (years)** |
| --- | --- | --- | --- | --- | --- |
| Muireann | Female | 64 | Unavailable | Unavailable | 30 |
| Peter | Male | 70 | Unavailable | Christian (Protestant) | 60 |
| Ishaan | Male | 71 | Unavailable | Unavailable | 30s |

**S1.6. Health Care Professionals Delivering SMA Newborn Screening in the Context of a Pilot Study**

| **Name** | **Gender** | **Age** | **Ethnicity** | **Religion** | **Role** | **Research Site** |
| --- | --- | --- | --- | --- | --- | --- |
| Renata | Female | 44 | White European | None | Research Midwife | Site 1 |
| Sonia | Female | 53 | Unavailable | Unavailable | Senior Research Midwife | Site 2 |
| Genevia | Female | 50 | Unavailable | Unavailable | Research Midwife | Site 2 |
| Joy | Female | 52 | White British | Unavailable | Research Midwife | Site 2 |
| Emily | Female | 47 | Unavailable | Unavailable | Research Midwife | Site 2 |

**S1.7. Health Care Professionals Involved in SMA Care**

| **Name** | **Gender** | **Age** | **Ethnicity** | **Religion** | **Role** |
| --- | --- | --- | --- | --- | --- |
| Caitlin | Female | 54 | White Scottish | None | Clinical geneticist (neuromuscular) |
| Elizabeth | Female | 35 | Unavailable | Unavailable | Neuromuscular specialist nurse |
| Natasha | Female | 35 | Unavailable | None | Genetic counsellor (previous role lab scientist) |
| Michael | Male | 43 | Mixed (other) | Christian Protestant | Consultant Clinical Geneticist |
| Jane | Female | 53 | White | None | Principal genetic counsellor (previously intensive care nurse) |
| Mary | Female | 64 | White British | Roman Catholic | Consultant Paediatric Neurologist |
| Nadia | Female | 46 | Arab | None | Paediatrician with expertise in neuromuscular disorders (runs a neuromuscular service) |
| Eliana | Female | 30 | Ashkenazi Jewish | Jewish | Genetic Counsellor |
| Jessica | Female | 38 | White British | None | Respiratory Physiotherapist |
| Rosalind | Female | 59 | White |  | Consultant Paediatric Neurologist |
| Sophie | Female | 44 | White | None | Lead genetic counsellor |

**S1.8. Parents whose baby underwent newborn screening for SMA through the Thames Valley Pilot Study**

| **Name** | **Gender** | **Age** | **Ethnicity** | **Religion** | **Screen Result** |
| --- | --- | --- | --- | --- | --- |
| Jo (married to Andrew) | Female | 42 | White British | None | Positive (baby treated with Risdiplam) |
| Andrew (married to Jo) | Male | 43 | White British | None | Positive  (baby treated with Risdiplam) |
| Charlotte | Female | 41 | White British | Christian | Negative |
| Faiza | Female | Unavailable | Swedish/Iraqi | Muslim | Negative |
| Katungi | Male | 32 | Black British | Christian | Negative |
| Nailah | Female | 34 | Egyptian/British | Muslim | Negative |
| Penny | Female | 31 | White British | None | Negative |
| Petra | Female | 47 | White European | None | Negative |
| Meghan | Female | 28 | White British | None | Negative |

**S2 Quantitative (Survey) Participant Characteristics**

**S2.1 Demographic characteristics of public respondents**

| Demographic Question | Categories | N | % |
| --- | --- | --- | --- |
| In which region do you currently live? | Greater London | 564 | 10.1% |
| Mid England (West Midlands, East Midlands, East of England) | 1436 | 25.6% |
| Northern England (North West, North East, Yorkshire, Humber) | 1483 | 26.5% |
| Northern Ireland | 107 | 1.9% |
| Scotland | 381 | 6.8% |
| Southern England (South West, South East) | 1321 | 23.6% |
| Wales | 312 | 5.6% |
| Total | 5604 |  |
| What is your gender? | Female | 3429 | 61.2% |
| Male | 2120 | 37.8% |
| Non-binary, genderfluid, other gender identity | 26 | 0.5% |
| Transgender | 19 | 0.3% |
| Prefer not to say | 10 | 0.2% |
| Total | 5604 |  |
| Which category includes your age? | 18-24 years | 599 | 10.7% |
| 25-34 years | 944 | 16.8% |
| 35-44 years | 1022 | 18.2% |
| 45-54 years | 1137 | 20.3% |
| 55-64 years | 1157 | 20.6% |
| 65 years or older | 745 | 13.3% |
| Total | 5604 |  |
| What was the highest level of schooling / education you have completed? | No qualifications | 286 | 5.1% |
| GCSE, Scottish Standard Grades, NVQ levels 1 or 2, or equivalent | 1443 | 25.7% |
| A-level, AS-level, Scottish Highers, NVQ level 3, or equivalent | 1140 | 20.3% |
| Vocational, professional, or further education qualification (including Diploma, NVQ level 4, BTEC, HND) | 915 | 16.3% |
| Degree level and above (including BA, BSc, Pg Cert, Pg Dip, MSc, PhD) | 1770 | 31.6% |
| Other / Prefer not to say | 50 | 0.9% |
| Total | 5604 |  |
| How would you describe your ethnicity? | Black | 324 | 5.8% |
| Middle East / Arab / Nort | 43 | 0.8% |
| Mixed | 140 | 2.5% |
| Other ethnicity | 16 | 0.3% |
| South Asian | 225 | 4.0% |
| Southeast / East Asian | 153 | 2.7% |
| White | 4655 | 83.1% |
| Prefer not to say | 48 | 0.9% |
| Total | 5604 |  |
| Do you have a religious faith or spirituality? | I have a strong faith | 995 | 17.8% |
| I identify with some aspects of a faith / religion, or consider myself to be non-practicing (brought up in a faith but do not necessarily follow its practices or rules) | 1343 | 24.0% |
| I am spiritual but do not identify with a particular faith / religion | 512 | 9.1% |
| No | 2636 | 47.0% |
| Prefer not to answer | 118 | 2.1% |
| Total | 5604 |  |
| If yes to above, which faith / religion? | Buddhism | 21 | 0.9% |
| Christian Catholic | 617 | 26.4% |
| Christian Orthodox | 266 | 11.4% |
| Christian Other | 23 | 1.0% |
| Christian Protestant | 1012 | 43.3% |
| Hinduism | 56 | 2.4% |
| Islam | 238 | 10.2% |
| Judaism | 16 | 0.7% |
| Other | 12 | 0.5% |
| Pagan | 5 | 0.2% |
| Sikhism | 15 | 0.6% |
| Prefer not to say | 57 | 2.4% |
| Total | 2338 |  |
| Do you have any children? | Yes | 3727 | 66.5% |
| No | 1844 | 32.9% |
| Other | 3 | 0.1% |
| Prefer not to say | 30 | 0.5% |
| Total | 5604 |  |
| Do you have any form of disability and / or a genetic condition? | Yes | 730 | 13.0% |
| No | 4787 | 85.4% |
| Prefer not to say | 87 | 1.6% |
| Total | 5604 |  |
| Before you took part in this survey, had you heard of Spinal Muscular Atrophy? | Yes, I have heard of Spinal Muscular Atrophy before | 2647 | 47.2% |
| No, I have not heard of Spinal Muscular Atrophy before | 2638 | 47.1% |
| I'm not sure | 319 | 5.7% |
| Total | 5604 |  |
| If yes, how have you heard of SMA? (participants could select as many options as relevant) | Media / social media | 2041 | 77.1% |
| I know someone (not family) | 334 | 12.6% |
| I have a family member with SMA | 216 | 8.2% |
| I have SMA | 130 | 4.9% |
| Other | 98 | 3.7% |
| Prefer not to say | 164 | 6.2% |
| Total | 2647 |  |

**S2.2. Demographics SMA community survey respondents**

|  | | Relationship to SMA by Category | | | | | | | | | |
| --- | --- | --- | --- | --- | --- | --- | --- | --- | --- | --- | --- |
| Carrier | | Family | | Family Friend | | Have SMA | | Category Total | |
| N | % | N | % | N | % | N | % | N | % |
| Category | | 4 |  | 214 |  | 11 |  | 21 |  | 250 |  |
| Gender | Female | 1 | 25.0% | 170 | 79.4% | 11 | 100.0% | 9 | 42.9% | 191 | 76.4% |
| Male | 3 | 75.0% | 43 | 20.1% | 0 | 0.0% | 11 | 52.4% | 57 | 22.8% |
| Non-binary | 0 | 0.0% | 1 | 0.5% | 0 | 0.0% | 1 | 4.8% | 2 | 0.8% |
| Age | 18 to 24 | 0 | 0.0% | 10 | 4.7% | 0 | 0.0% | 3 | 14.3% | 13 | 5.2% |
| 25 to 34 | 2 | 50.0% | 36 | 16.8% | 3 | 27.3% | 5 | 23.8% | 46 | 18.4% |
| 35 to 44 | 0 | 0.0% | 39 | 18.2% | 2 | 18.2% | 6 | 28.6% | 47 | 18.8% |
| 45 to 54 | 1 | 25.0% | 33 | 15.4% | 4 | 36.4% | 1 | 4.8% | 39 | 15.6% |
| 55 to 64 | 0 | 0.0% | 40 | 18.7% | 1 | 9.1% | 2 | 9.5% | 43 | 17.2% |
| 65 and over | 1 | 25.0% | 56 | 26.2% | 1 | 9.1% | 4 | 19.0% | 62 | 24.8% |
| Children | Yes | 4 | 100.0% | 185 | 86.4% | 8 | 72.7% | 8 | 38.1% | 205 | 80.0% |
| No | 0 | 0.0% | 29 | 13.6% | 3 | 27.3% | 13 | 61.9% | 45 | 18% |
| Education | A-level, AS-level, Scottish Highers, NVQ level 3, or equivalent | 0 | 0.0% | 28 | 13.1% | 3 | 27.3% | 3 | 14.3% | 34 | 13.6% |
| Degree level and above (including BA, BSc, Pg Cert, Pg Dip, MSc, PhD) | 4 | 100.0% | 103 | 48.1% | 6 | 54.5% | 11 | 52.4% | 124 | 49.6% |
| GCSE, Scottish Standard Grades, NVQ levels 1 or 2, or equivalent | 0 | 0.0% | 31 | 14.5% | 1 | 9.1% | 2 | 9.5% | 34 | 13.6% |
| No qualifications | 0 | 0.0% | 6 | 2.8% | 0 | 0.0% | 0 | 0.0% | 6 | 2.4% |
| Prefer not to say | 0 | 0.0% | 4 | 1.9% | 0 | 0.0% | 1 | 4.8% | 5 | 2.0% |
| Vocational, professional, or further education qualification (including Diploma, NVQ level 4, BTEC, HND) | 0 | 0.0% | 42 | 19.6% | 1 | 9.1% | 4 | 19.0% | 47 | 18.8% |
| Region | Greater London | 1 | 25.0% | 17 | 7.9% | 4 | 36.4% | 2 | 9.5% | 24 | 9.6% |
| Mid England (West Midlands, East Midlands, East of England) | 1 | 25.0% | 27 | 12.6% | 0 | 0.0% | 0 | 0.0% | 28 | 11.2% |
| Northern England (North West, North East, Yorkshire, Humber) | 0 | 0.0% | 34 | 15.9% | 0 | 0.0% | 5 | 23.8% | 39 | 15.6% |
| Northern Ireland | 0 | 0.0% | 5 | 2.3% | 0 | 0.0% | 0 | 0.0% | 5 | 2.0% |
| Other | 0 | 0.0% | 1 | 0.5% | 0 | 0.0% | 0 | 0.0% | 1 | 0.4% |
| Scotland | 0 | 0.0% | 22 | 10.3% | 2 | 18.2% | 1 | 4.8% | 25 | 10.0% |
| Southern England (South West, South East) | 2 | 50.0% | 102 | 47.7% | 5 | 45.5% | 12 | 57.1% | 121 | 48.4% |
| Wales | 0 | 0.0% | 6 | 2.8% | 0 | 0.0% | 1 | 4.8% | 7 | 2.8% |
| Ethnicity | Black | 0 | 0.0% | 1 | 0.5% | 1 | 9.1% | 0 | 0.0% | 2 | 0.8% |
| Mixed or multiple race | 0 | 0.0% | 3 | 1.4% | 0 | 0.0% | 0 | 0.0% | 3 | 1.2% |
| Other | 0 | 0.0% | 1 | 0.5% | 0 | 0.0% | 0 | 0.0% | 1 | 0.4% |
| South Asian | 0 | 0.0% | 2 | 0.9% | 0 | 0.0% | 1 | 4.8% | 3 | 1.2% |
| White | 4 | 100.0% | 207 | 96.7% | 10 | 90.9% | 20 | 95.2% | 241 | 96.4% |
| Faith | I am spiritual but do not identify with a particular faith / religion | 0 | 0.0% | 15 | 7.0% | 0 | 0.0% | 3 | 14.3% | 18 | 7.2% |
| I have a strong faith | 1 | 25.0% | 37 | 17.3% | 4 | 36.4% | 3 | 14.3% | 45 | 18.0% |
| I identify with some aspects of a faith / religion, or consider myself to be ‘non-practicing’ (brought up in a faith but do not necessarily follow its practices or rules) | 0 | 0.0% | 80 | 37.4% | 3 | 27.3% | 4 | 19.0% | 87 | 34.8% |
| No | 3 | 75.0% | 74 | 34.6% | 4 | 36.4% | 11 | 52.4% | 92 | 36.8% |
| Prefer not to answer | 0 | 0.0% | 8 | 3.7% | 0 | 0.0% | 0 | 0.0% | 8 | 3.2% |
| Type SMA | Not specified / Don’t know | 4 | 100.0% | 12 | 5.6% | 9 | 81.8% | 0 | 0.0% | 25 | 10.0% |
| Type 1 | 0 | 0.0% | 150 | 70.1% | 2 | 18.2% | 0 | 0.0% | 152 | 60.8% |
| Type 2 | 0 | 0.0% | 35 | 16.4% | 0 | 0.0% | 9 | 42.9% | 44 | 17.6% |
| Type 3 | 0 | 0.0% | 13 | 6.1% | 0 | 0.0% | 10 | 47.6% | 23 | 9.2% |
| Type4/other form | 0 | 0.0% | 4 | 1.9% | 0 | 0.0% | 2 | 9.5% | 6 | 2.4% |

**S2.3. Demographics of healthcare professional survey participants**

|  | | N | % |
| --- | --- | --- | --- |
| Profession category | Associate and allied care professions (including occupational therapist, speech and language therapist, psychologist, researcher, physician associate)* | 14 | 12.1% |
| Clinical Geneticist | 10 | 8.6% |
| Genetic Counsellor | 14 | 12.1% |
| Midwife (including research midwife) | 9 | 7.8% |
| Neuromuscular Physiotherapist and Physiotherapist | 31 | 26.7% |
| Nurse – SMA, Neuromuscular and/ or paediatric | 14 | 12.1% |
| Paediatric neurologist, neurologist, other paediatric specialism | 24 | 20.7% |
| Years in profession | 5 or fewer years | 20 | 17.2% |
| 6 to 10 years | 21 | 18.1% |
| 11 to 15 years | 22 | 19.0% |
| 16 to 20 years | 21 | 18.1% |
| Over 20 years | 32 | 27.6% |
| Gender | Female | 100 | 86.2% |
| Male | 13 | 11.2% |
| Non-binary | 1 | 0.9% |
| Prefer not to say | 2 | 1.7% |
| Region | Greater London | 27 | 23.3% |
| Mid England (West Midlands, East Midlands, East of England) | 17 | 14.7% |
| Northern England (North West, North East, Yorkshire, Humber) | 26 | 22.4% |
| Northern Ireland | 2 | 1.7% |
| Scotland | 8 | 6.9% |
| Southern England (South West, South East) | 36 | 31.0% |
| Age | 18-24 years | 2 | 1.7% |
| 25-34 years | 28 | 24.1% |
| 35-44 years | 40 | 34.5% |
| 45-54 years | 29 | 25.0% |
| 55-64 years | 14 | 12.1% |
| 65 years or older | 1 | 0.9% |
| Prefer not to say | 2 | 1.7% |
| Ethnicity | Black | 1 | 0.9% |
| Middle East / Arab / North African | 1 | 0.9% |
| Mixed or multiple race | 1 | 0.9% |
| Prefer not to say | 7 | 6.0% |
| South Asian | 3 | 2.6% |
| White | 103 | 88.8% |
| Religious faith or spirituality | I am spiritual but do not identify with a particular faith / religion | 5 | 4.3% |
| I have a strong faith | 21 | 18.1% |
| I identify with some aspects of a faith / religion, or consider myself to be ‘non-practicing’ (brought up in a faith but do not necessarily follow its practices or rules) | 30 | 25.9% |
| No | 51 | 44.0% |
| Prefer not to answer | 9 | 7.8% |
| Do you have any children | Yes (including 4 currently pregnant) | 76 | 65.5% |
| No | 36 | 31.0% |
| Pregnant | 2 | 1.7% |
| Prefer not to say | 2 | 1.7% |

*Associated and allied healthcare includes professions with 5 or fewer respondents.

**S2.4. Demographic characteristics of parents approached to take part in screening for SMA (Thames Valley SMA Screening Pilot)**

|  | | N | % |
| --- | --- | --- | --- |
| How would you describe your gender? | Female | 3435 | 97.0% |
| Male | 98 | 2.8% |
| Non-binary | 6 | 0.2% |
| Transgender male | 1 | 0.0% |
| Prefer not to say | 1 | 0.0% |
| What is your age? | 18-24 years | 151 | 4.3% |
| 25-34 years | 1904 | 53.8% |
| 35-44 years | 1444 | 40.8% |
| 45-54 years | 40 | 1.1% |
| 55-64 years | 1 | 0.0% |
| Prefer not to say | 1 | 0.0% |
| Has your baby been born? | Yes | 3531 | 99.7% |
| No | 10 | 0.3% |
| Do you have any children other than your baby who has been offered screening for SMA? | No | 2098 | 59.2% |
| Yes | 1413 | 39.9% |
| Other | 24 | 0.7% |
| Prefer not to say | 6 | 0.2% |
| What is the highest level of education you have achieved? | No qualifications | 21 | 0.6% |
| GCSE, Scottish Standard Grades, NVQ levels 1 or 2, or equivalent | 291 | 8.2% |
| A-level, AS-level, Scottish Highers, NVQ level 3, or equivalent | 409 | 11.6% |
| Vocational, professional, or further education qualification (including Diploma, NVQ level 4, BTEC, HND) | 325 | 9.2% |
| Degree level and above (including BA, BSc, Pg Cert, Pg Dip, MSc, PhD) | 2457 | 69.4% |
| Other | 2 | 0.1% |
| Prefer not to say | 36 | 1.0% |
| In which UK region do you currently live? | Greater London | 56 | 1.6% |
| Mid England (West Midlands, East Midlands, East of England) | 273 | 7.7% |
| Northern England (North West, North East, Yorkshire, Humber) | 18 | 0.5% |
| Northern Ireland | 4 | 0.1% |
| Southern England (South West, South East) | 3178 | 89.7% |
| Wales | 3 | 0.1% |
| Prefer not to answer / other | 9 | 0.3% |
| How would you describe your ethnicity? | Black | 52 | 1.5% |
| Middle East / Arab / North African | 13 | 0.4% |
| Mixed or multiple race | 89 | 2.5% |
| South Asian | 113 | 3.2% |
| Southeast / East Asian | 60 | 1.7% |
| White | 3192 | 90.1% |
| Other | 11 | 0.3% |
| Prefer not to say | 11 | 0.3% |
| Do you have a religious faith? | I have a strong faith | 413 | 11.7% |
| I identify with some aspects of a faith / religion, or consider myself to be ‘non-practicing’ (brought up in a faith but do not necessarily follow its practices or rules) | 844 | 23.8% |
| I am spiritual but do not identify with a particular faith / religion | 203 | 5.7% |
| No | 2029 | 57.3% |
| Prefer not to answer | 52 | 1.5% |
| If yes, which faith? | Buddhism | 11 | 0.9% |
| Christian - Catholic | 340 | 27.0% |
| Christian - Orthodox | 88 | 7.0% |
| Christian - Protestant | 627 | 49.9% |
| Christian - Other | 26 | 2.1% |
| Hinduism | 26 | 2.1% |
| Islam | 73 | 5.8% |
| Judaism | 7 | 0.6% |
| Paganism | 4 | 0.3% |
| Sikhism | 13 | 1.0% |
| Other | 4 | 0.3% |
| Prefer not to say | 38 | 3.0% |
| Before being approached to take part in the screening pilot, did you have any prior knowledge of SMA? | Not heard of SMA | 1919 | 54.2% |
| Not sure if heard of SMA | 87 | 2.5% |
| General knowledge / unspecified | 40 | 1.1% |
| I have seen stories in the media | 1003 | 28.3% |
| Conducted personal research into SMA when pregnant | 6 | 0.2% |
| Studied SMA during education | 49 | 1.4% |
| Know of someone with SMA | 20 | 0.6% |
| Know someone with SMA | 92 | 2.6% |
| Have family member with SMA | 16 | 0.5% |
| Have a child with SMA | 2 | 0.1% |
| Knowledge through being a teacher | 5 | 0.1% |
| Teacher with experience teaching children with SMA | 11 | 0.3% |
| HCP - specified having experience treating / supporting people with SMA | 61 | 1.7% |
| HCP – did not specify whether experience treating / supporting SMA patients | 118 | 3.3% |
| Information from family member who is an HCP | 12 | 0.3% |
| Work related knowledge but profession not specified | 60 | 1.7% |
| Work in pharmaceutical or biomedical field / research | 27 | 0.8% |
| Prefer not to answer | 13 | 0.4% |
| Total | 3541 | 100.0% |

HCP = healthcare professional

**S3. Health professional score for importance of the different** **impacts (benefits or harms) of SMA newborn screening from 0 to 100**

**(0 being not important at all and 100 very important).**

|  | N | Mean | Minimum | Maximum | Std. Deviation |
| --- | --- | --- | --- | --- | --- |
| Newborn screening will increase the survival of many babies with severest forms | 110 | 95.5 | 8 | 100 | 12.6 |
| Newborn screening will reduce symptom severity and degree of disability for many babies with SMA | 111 | 97.4 | 37 | 100 | 8.8 |
| Newborn screening will mean that many babies with SMA will not develop any disability | 110 | 81.1 | 0 | 100 | 26.4 |
| Newborn screening will mean fewer parents go through long & upsetting process of getting diagnosis based on child's symptoms | 110 | 89.4 | 23 | 100 | 15.7 |
| Newborn screening will cause stress and anxiety to parents of babies with later-onset SMA (because no treatment offered) | 110 | 54.5 | 0 | 100 | 29.0 |
| Newborn screening will make parents aware, as soon as possible, that they could have another child with SMA | 109 | 90.8 | 1 | 100 | 16.1 |
| Newborn screening will provide important information for the whole family (may be other carriers of SMA) | 110 | 89.9 | 41 | 100 | 15.2 |
| Newborn screening will provide important information for families of babies with later-onset SMA (even though they may not get treatment) | 110 | 69.9 | 1 | 100 | 29.1 |
| Newborn screening will provide useful information for medical / scientific research | 108 | 65.1 | 0 | 100 | 31.0 |

**S4. Importance score given to statements (0 being not at all important to 100 very important) by people living with SMA.**

|  | N | Mean | Std Error | Median | Min | Max |
| --- | --- | --- | --- | --- | --- | --- |
| NBS will increase the survival of many babies with severest forms | 230 | 96.7 | 0.718 | 100 | 10 | 100 |
| NBS will reduce symptom severity and degree of disability for many babies with SMA | 230 | 95.8 | 0.915 | 100 | 0 | 100 |
| NBS will mean that many babies with SMA will not develop any disability | 230 | 82.9 | 1.904 | 100 | 0 | 100 |
| NBS will mean fewer parents go through long & upsetting process of getting diagnosis based on child's symptoms | 228 | 93.1 | 1.05 | 100 | 9 | 100 |
| NBS will cause stress and anxiety to parents of babies with later-onset SMA (because no treatment offered) | 228 | 51.9 | 2.035 | 50 | 0 | 100 |
| NBS will make parents aware, as soon as possible, that they could have another child with SMA | 228 | 93.2 | 1.116 | 100 | 5 | 100 |
| NBS will provide important information for the whole family (may be other carriers of SMA) | 228 | 93.8 | 1.013 | 100 | 6 | 100 |
| NBS will provide important information for families of babies with later-onset SMA (even though they may not get treatment) | 228 | 88.1 | 1.37 | 100 | 0 | 100 |
| NBS will provide useful information for medical / scientific research | 228 | 88.3 | 1.417 | 100 | 1 | 100 |
