# Supplementary material for: Acceptability of newborn screening for Spinal Muscular Atrophy: views of the UK public, screened families, health professionals and SMA community
Source: Research Square preprint supplement (doi:10.21203/rs.3.rs-8881933/v1), 2026-02-23
Supplement: Supplementary file 2 [file c260a80809418d289cc68ed5.docx]

**Table 1: Number of study participants by group**

|  | | Total number of participants | |
| --- | --- | --- | --- |
| Participant group | | **Interviews** | **Surveys** |
| General Public | | 10 | 5604 |
| Families and adults living with SMA | Total | 21 | 250 |
| Type I | 7 |
| Type II | 6 |
| Type III | 5 |
| Type IV | 3 |
| Healthcare professionals | | 16 | 116 |
| Parents of screened newborns (total)  Screen negative parents  Screen positive parents | | 9  7  2 | 3541 |
| Total | | **56** | **9511** |

**Table 2. Survey responses to statements concerning screening for SMA by participant group**

|  |  | Healthcare professionals | | SMA community | | Screening pilot parents | | Public | | Total | | Pearson Chi-Square Tests | | Cramer's V  (df = 2) |
| --- | --- | --- | --- | --- | --- | --- | --- | --- | --- | --- | --- | --- | --- | --- |
|  |  | N | % | N | % | N | % | N | % | N | % |
| Adding SMA to the heel prick test will mean that more people in society will become aware of what SMA is and what it means to be born with this condition | Agree | 106 | 91.4% | 246 | 98.4% | 2283 | 96.4% | 5183 | 92.5% | 7818 | 93.8% | Chi-sq | 72.689 |  |
| Disagree | 5 | 4.3% | 3 | 1.2% | 15 | 0.6% | 52 | 0.9% | 75 | 0.9% | df | 6 |  |
| Other | 5 | 4.3% | 1 | 0.4% | 71 | 3.0% | 369 | 6.6% | 446 | 5.3% | Sig. | <.001 | 0.066 |
| Most parents will agree to newborn screening for SMA without giving it much thought, as they will see it as a routine test | Agree | 112 | 96.6% | 239 | 95.6% | 2291 | 96.7% | 4895 | 87.4% | 7537 | 90.4% | Chi-sq | 179.623 |  |
| Disagree | 1 | 0.9% | 3 | 1.2% | 12 | 0.5% | 158 | 2.8% | 174 | 2.1% | df | 6 |  |
| Other | 3 | 2.6% | 8 | 3.2% | 66 | 2.8% | 545 | 9.7% | 622 | 7.5% | Sig. | <.001 | 0.104 |
| Adding SMA to newborn screening might cause some parents to decide not to have the heel prick test done (and so their baby won't be screened for any of the conditions included in the test) | Agree | 4 | 3.4% | 19 | 7.6% | 139 | 5.9% | 2107 | **38.2%** | 2269 | 27.5% | Chi-sq | 1756.086 |  |
| Disagree | 96 | 82.8% | 193 | 77.2% | 1915 | 80.8% | 1793 | 32.5% | 3997 | 48.4% | df | 6 |  |
| Other | 16 | 13.8% | 38 | 15.2% | 315 | 13.3% | 1615 | 29.3% | 1984 | 24.0% | Sig. | <.001 | **0.326** |
| Parents of newborn babies are often too tired and distracted to make an informed decision about whether to have their baby screened (using the heel prick test) | Agree | 28 | 24.1% | 47 | 18.8% | 591 | 24.9% | 2556 | **46.3%** | 3222 | 39.1% | Chi-sq | 544.514 |  |
| Disagree | 64 | 55.2% | 165 | 66.0% | 1259 | 53.1% | 1636 | 29.7% | 3124 | 37.9% | df | 6 |  |
| Other | 24 | 20.7% | 38 | 15.2% | 519 | 21.9% | 1323 | 24.0% | 1904 | 23.1% | Sig. | <.001 | 0.182 |
| Some parents will feel pressured to agree to newborn screening for SMA as the right thing to do for their baby, even if they do not want it | Agree | 27 | 23.3% | 46 | 18.4% | 569 | 24.0% | 2930 | **53.6%** | 3572 | 43.6% | Chi-sq | 891.062 |  |
| Disagree | 64 | 55.2% | 150 | 60.0% | 1160 | 49.0% | 1162 | 21.3% | 2536 | 30.9% | df | 6 |  |
| Other | 25 | 21.6% | 54 | 21.6% | 640 | 27.0% | 1372 | 25.1% | 2091 | 25.5% | Sig. | <.001 | **0.233** |
| Some parents might feel stressed and anxious about whether their child has SMA while they are waiting for their screening result, even though it is a rare condition | Agree | 48 | 41.4% | 109 | 43.6% | 1211 | 51.1% | 3863 | **70.7%** | 5231 | 63.8% | Chi-sq | 435.024 |  |
| Disagree | 43 | 37.1% | 87 | 34.8% | 542 | 22.9% | 578 | 10.6% | 1250 | 15.2% | df | 6 |  |
| Other | 25 | 21.6% | 54 | 21.6% | 616 | 26.0% | 1023 | 18.7% | 1718 | 21.0% | Sig. | <.001 | 0.163 |
| It is important that the parents of all newborn babies are offered screening so that babies with SMA can be offered treatment at the earliest opportunity | Agree | 115 | 99.1% | 244 | 98.4% | 2341 | 98.8% | 5026 | 92.9% | 7726 | 94.9% | Chi-sq | 129.315 |  |
| Disagree | 0 | 0.0% | 1 | 0.4% | 2 | 0.1% | 56 | 1.0% | 59 | 0.7% | df | 6 |  |
| Other | 1 | 0.9% | 3 | 1.2% | 26 | 1.1% | 326 | 6.0% | 356 | 4.4% | Sig. | <.001* | 0.089 |
| It will be hard for parents to come to terms with (or accept) a diagnosis of SMA from newborn screening if their baby appears well | Agree | 77 | 66.4% | 162 | 65.3% | 1413 | 59.6% | 4216 | **78.0%** | 5868 | 72.1% | Chi-sq | 331.463 |  |
| Disagree | 19 | 16.4% | 44 | 17.7% | 407 | 17.2% | 363 | 6.7% | 833 | 10.2% | df | 6 |  |
| Other | 20 | 17.2% | 42 | 16.9% | 549 | 23.2% | 829 | 15.3% | 1440 | 17.7% | Sig. | <.001 | 0.143 |
| It would be better to diagnose SMA from symptoms (the current situation) rather than start screening all newborns for a condition that most will not have | Agree | 1 | 0.9% | 4 | 1.6% | 104 | 4.4% | 1567 | **29.2%** | 1676 | 20.7**%** | Chi-sq | 1210.705 |  |
| Disagree | 109 | 94.0% | 235 | 94.8% | 2115 | 89.3% | 2741 | 51.1% | 5200 | 64.2% | df | 6 |  |
| Other | 6 | 5.2% | 9 | 3.6% | 150 | 6.3% | 1057 | 19.7% | 1222 | 15.1% | Sig. | <.001 | **0.273** |
| Parents should not be able to choose whether to have their baby screened for SMA, it should mandatory / compulsory | Agree | 32 | 27.6% | 126 | **50.8%** | 764 | 32.2% | 1913 | 35.8% | 2835 | 35.1% | Chi-sq | 69.566 |  |
| Disagree | 68 | 58.6% | 81 | 32.7% | 1132 | 47.8% | 2193 | 41.1% | 3474 | 43.0% | df | 6 |  |
| Other | 16 | 13.8% | 41 | 16.5% | 473 | 20.0% | 1231 | 23.1% | 1761 | 21.8% | Sig. | <.001 | 0.066 |
| I think all newborn babies should be offered screening for SMA (as part of the standard heel prick test) | Agree | 113 | 97.4% | 245 | 98.8% | 2321 | 98.0% | 4824 | 90.4% | 7503 | 93.0% | Chi-sq | 164.988 |  |
| Disagree | 0 | 0.0% | 2 | 0.8% | 2 | 0.1% | 95 | 1.8% | 99 | 1.2% | df | 6 |  |
| Other | 3 | 2.6% | 1 | 0.4% | 46 | 1.9% | 418 | 7.8% | 468 | 5.8% | Sig. | <.001 | 0.101 |

Cramer’s V - bold text indicates moderate association (between 0.21 and 0.35). Bold % indicate groups that differed by at least 10% from the other groups.

* The minimum expected cell count <1, Chi-square results may be invalid (Fisher's Exact could not compute).

**Table 3. Survey responses to statements concerning later onset SMA by participant group**

|  |  | Healthcare professionals | | SMA community | | Public | | Total | | Pearson Chi-Square Tests | | Cramer's V (df = 2) |
| --- | --- | --- | --- | --- | --- | --- | --- | --- | --- | --- | --- | --- |
|  |  | N | % | N | % | N | % | N | % |
| Diagnosing babies with later-onset SMA is a good thing, because it will give parents and the child time to come to terms with the diagnosis and prepare for the future (mentally and financially, making life-choices based on future disability needs) | Agree | 68 | **59.1%** | 196 | 79.7% | 4004 | 77.7% | 4268 | 77.4% | Chi-sq | 51.367 | 0.068 |
| Disagree | 30 | 26.1% | 24 | 9.8% | 413 | 8.0% | 467 | 8.5% | df | 4 |  |
| Other | 17 | 14.8% | 26 | 10.6% | 735 | 14.3% | 778 | 14.1% | Sig. | <.001 |  |
| Diagnosing later-onset SMA at birth will create a lot of anxiety for parents (and later the child) as they wait for symptoms to start | Agree | 79 | 68.7% | 160 | 65.0% | 3503 | 68.0% | 3742 | 67.9% | Chi-sq | 15.925 | 0.038 |
| Disagree | 18 | 15.7% | 44 | 17.9% | 560 | 10.9% | 622 | 11.3% | df | 4 |  |
| Other | 18 | 15.7% | 42 | 17.1% | 1089 | 21.1% | 1149 | 20.8% | Sig. | 0.003 |  |
| Identifying babies with later-onset SMA will lead them to grow up feeling that they are different or already affected, despite not having symptoms yet | Agree | 55 | 47.8% | 89 | **36.2%** | 2562 | 50.2% | 2706 | 49.5% | Chi-sq | 40.537 | 0.061 |
| Disagree | 29 | 25.2% | 86 | 35.0% | 982 | 19.2% | 1097 | 20.1% | df | 4 |  |
| Other | 31 | 27.0% | 71 | 28.9% | 1562 | 30.6% | 1664 | 30.4% | Sig. | <.001 |  |
| Knowing that they are likely to develop SMA later in life will prevent children from enjoying life while they are symptom-free | Agree | 26 | 22.6% | 35 | 14.2% | 1861 | **36.4%** | 1922 | 35.2% | Chi-sq | 96.348 | 0.094 |
| Disagree | 62 | 53.9% | 157 | 63.8% | 1851 | 36.3% | 2070 | 37.9% | df | 4 |  |
| Other | 27 | 23.5% | 54 | 22.0% | 1394 | 27.3% | 1475 | 27.0% | Sig. | <.001 |  |
| Babies diagnosed with later-onset SMA will miss out on many opportunities as they grow up because of concerns over their future disability (such as not taking part in sports, or choosing not to do very physical jobs) | Agree | 23 | 20.0% | 35 | 14.4% | 2130 | **42.0%** | 2188 | 40.3% | Chi-sq | 158.88 | 0.121 |
| Disagree | 68 | 59.1% | 159 | 65.4% | 1616 | 31.9% | 1843 | 34.0% | df | 4 |  |
| Other | 24 | 20.9% | 49 | 20.2% | 1322 | 26.1% | 1395 | 25.7% | Sig. | <.001 |  |
| Babies diagnosed with later-onset SMA will experience stigma and be treated differently by others as they grow up (before they have symptoms) and then into adulthood. | Agree | 12 | 10.4% | 29 | 11.9% | 1816 | **35.8%** | 1857 | 34.2% | Chi-sq | 155.953 | 0.12 |
| Disagree | 72 | 62.6% | 168 | 69.1% | 1796 | 35.4% | 2036 | 37.5% | df | 4 |  |
| Other | 31 | 27.0% | 46 | 18.9% | 1456 | 28.7% | 1533 | 28.3% | Sig. | <.001 |  |
| It would be better to diagnose people with later-onset SMA when their symptoms start (current situation) to avoid them worrying about it while they are symptom free | Agree | 27 | **23.5%** | 24 | **10.0%** | 1987 | **39.5%** | 2038 | 37.9% | Chi-sq | 190.728 | 0.133 |
| Disagree | 66 | 57.4% | 185 | 77.4% | 1793 | 35.6% | 2044 | 38.0% | df | 4 |  |
| Other | 22 | 19.1% | 30 | 12.6% | 1250 | 24.9% | 1302 | 24.2% | Sig. | <.001 |  |
| Diagnosing babies with later-onset SMA at birth is a good thing, because it will mean that parents know to look for any symptoms starting in childhood, which could mean that their child would then be able to access the new drug treatments | Agree | 96 | 83.5% | 230 | **96.2%** | 4177 | 83.6% | 4503 | 84.2% | Chi-sq | 33.881 | 0.056 |
| Disagree | 9 | 7.8% | 3 | 1.3% | 187 | 3.7% | 199 | 3.7% | df | 4 |  |
| Other | 10 | 8.7% | 6 | 2.5% | 631 | 12.6% | 647 | 12.1% | Sig. | <.001 |  |
| Parents should not be told about their baby having a later-onset condition if there is no treatment to prevent it from happening | Agree | 18 | 15.7% | 9 | **3.8%** | 803 | 16.1% | 830 | 15.5% | Chi-sq | 39.958 | 0.061 |
| Disagree | 80 | 69.6% | 205 | 86.1% | 3364 | 67.3% | 3649 | 68.2% | df | 4 |  |
| Other | 17 | 14.8% | 24 | 10.1% | 828 | 16.6% | 869 | 16.2% | Sig. | <.001 |  |
| Diagnosing newborn babies with adult-onset SMA is a good thing, because treatments might become available to these children in the future | Agree | 88 | 76.5% | 229 | **96.2%** | 4211 | 84.7% | 4528 | 85.0% | Chi-sq | 50.87 | 0.069 |
| Disagree | 13 | 11.3% | 3 | 1.3% | 148 | 3.0% | 164 | 3.1% | df | 4 |  |
| Other | 14 | 12.2% | 6 | 2.5% | 612 | 12.3% | 632 | 11.9% | Sig. | <.001 |  |
| Parents should not be told at birth that their baby could develop SMA later in childhood or as an adult, it should be the child's choice whether to have this information when they are old enough to understand | Agree | 22 | 19.1% | 15 | **6.3%** | 810 | 16.3% | 847 | 15.9% | Chi-sq | 40.799 | 0.062 |
| Disagree | 81 | 70.4% | 199 | 84.0% | 3240 | 65.2% | 3520 | 66.1% | df | 4 |  |
| Other | 12 | 10.4% | 23 | 9.7% | 921 | 18.5% | 956 | 18.0% | Sig. | <.001 |  |
| Identifying later-onset forms of SMA at birth is a good thing, because it will save the parents or child (as an adult) searching for a diagnosis when symptoms start | Agree | 92 | 80.0% | 229 | **96.6%** | 3891 | 78.6% | 4212 | 79.5% | Chi-sq | 46.552 | 0.066 |
| Disagree | 8 | 7.0% | 2 | 0.8% | 244 | 4.9% | 254 | 4.8% | df | 4 |  |
| Other | 15 | 13.0% | 6 | 2.5% | 813 | 16.4% | 834 | 15.7% | Sig. | <.001 |  |
| Diagnosing newborn babies with later-onset SMA is a good thing, because it will provide useful information for medical and scientific research | Agree | 81 | 70.4% | 218 | **92.0%** | 3925 | 79.3% | 4224 | 79.7% | Chi-sq | 35.335 | 0.058 |
| Disagree | 13 | 11.3% | 3 | 1.3% | 232 | 4.7% | 248 | 4.7% | df | 4 |  |
| Other | 21 | 18.3% | 16 | 6.8% | 790 | 16.0% | 827 | 15.6% | Sig. | <.001 |  |
| I would only support parents being told that their baby will develop SMA later in childhood, or as adults, if all these babies were given access to the drug treatments | Agree | 39 | 34.2% | 74 | 31.4% | 2330 | **47.4%** | 2443 | 46.4% | Chi-sq | 107.412 | 0.101 |
| Disagree | 49 | 43.0% | 108 | 45.8% | 1031 | 21.0% | 1188 | 22.5% | df | 4 |  |
| Other | 26 | 22.8% | 54 | 22.9% | 1559 | 31.7% | 1639 | 31.1% | Sig. | <.001 |  |
| I would support parents being told that their baby is likely to develop later-onset SMA, even though many of these babies will not be eligible for the drug treatments (as they will have adult onset SMA) | Agree | 68 | 59.6% | 186 | **78.8%** | 2866 | 58.3% | 3120 | 59.2% | Chi-sq | 44.344 | 0.065 |
| Disagree | 20 | 17.5% | 12 | 5.1% | 594 | 12.1% | 626 | 11.9% | df | 4 |  |
| Other | 26 | 22.8% | 38 | 16.1% | 1460 | 29.7% | 1524 | 28.9% | Sig. | <.001 |  |
| On balance, would you support the introduction of screening for SMA in newborn babies as part of the heel prick test | Yes | 104 | 94.5% | 228 | 98.7% | 4183 | 86.8% | 4515 | 87.5% | Chi-sq |  | 0.057 |
| No | 1 | 0.9% | 1 | 0.4% | 91 | 1.9% | 93 | 1.8% | df | 6 |  |
| Prefer not to answer | 0 | 0.0% | 0 | 0.0% | 55 | 1.1% | 55 | 1.1% | Sig. | <.001* |  |
| Undecided | 5 | 4.5% | 2 | 0.9% | 490 | 10.2% | 497 | 9.6% |  |  |  |

***** Fisher’s Exact.Bold % indicate groups that differed by at least 10% from the other groups.

**Table 4. Comparison between professions in attitudes towards screening.**

| Statement | Response |  | Associated / allied profession | Clinical Geneticist | Genetic Counsellor | Nurse (SMA, neuromuscular and paediatric) | Paediatric specialist, neurologist, other doctor | Total |
| --- | --- | --- | --- | --- | --- | --- | --- | --- |
| Parents of newborn babies are often too tired and distracted to make an informed decision about whether to have their baby screened (using the heel prick test) | Agree | N | 9 | 4 | 10 | 1 | 4 | 28 |
|  | % | 16.7% | 40.0% | **71.4%** | 7.1% | 16.7% | 24.1% |
| Disagree | N | 30 | 6 | 1 | 11 | 16 | 64 |
|  | % | 55.6% | 60.0% | **7.1%** | 78.6% | 66.7% | 55.2% |
| Other | N | 15 | 0 | 3 | 2 | 4 | 24 |
|  | % | 27.8% | 0.0% | 21.4% | 14.3% | 16.7% | 20.7% |
| Significance (Fisher’s Exact) | **P <0.001** |  |  |  |  |  |  |
| Some parents will feel pressured to agree to newborn screening for SMA as the ‘right thing’ to do for their baby, even if they do not want it | Agree | N | 13 | 2 | 9 | 0 | 3 | 27 |
|  | % | 24.1% | 20.0% | **64.3%** | **0.0%** | **12.5%** | 23.3% |
| Disagree | N | 24 | 6 | 3 | 13 | 18 | 64 |
|  | % | 44.4% | 60.0% | **21.4%** | **92.9%** | **75.0%** | 55.2% |
| Other | N | 17 | 2 | 2 | 1 | 3 | 25 |
|  | % | 31.5% | 20.0% | 14.3% | 7.1% | 12.5% | 21.6% |
| Significance (Fisher’s Exact) | **P<0.001** |  |  |  |  |  |  |
| Parents should not be able to choose whether to have their baby screened for SMA, it should mandatory / compulsory | Agree | N | 15 | 0 | 0 | 9 | 8 | 32 |
|  | % | 27.8% | **0.0%** | **0.0%** | **64.3%** | 33.3% | 27.6% |
| Disagree | N | 33 | 9 | 12 | 4 | 10 | 68 |
|  | % | 61.1% | **90.0%** | **85.7%** | **28.6%** | 41.7% | 58.6% |
| Other | N | 6 | 1 | 2 | 1 | 6 | 16 |
|  | % | 11.1% | 10.0% | 14.3% | 7.1% | 25.0% | 13.8% |
| Significance (Fisher’s Exact) | **P <0.001** |  |  |  |  |  |  |
| Diagnosing babies with later-onset SMA is a good thing, because it will give parents and the child time to come to terms with the diagnosis and prepare for the future (mentally and financially, making life-choices based on future disability needs) | Agree | N | 33 | 4 | 5 | 13 | 13 | 68 |
|  | % | 62.3% | 40.0% | **35.7%** | **92.9%** | 54.2% | 59.1% |
| Disagree | N | 12 | 4 | 7 | 0 | 7 | 30 |
|  | % | 22.6% | 40.0% | **50.0%** | **0.0%** | 29.2% | 26.1% |
| Other | N | 8 | 2 | 2 | 1 | 4 | 17 |
|  | % | 15.1% | 20.0% | 14.3% | 7.1% | 16.7% | 14.8% |
| Significance (Fisher’s Exact) | ***P = 0.06*** |  |  |  |  |  |  |
| Diagnosing later-onset SMA at birth will create a lot of anxiety for parents (and later the child) as they wait for symptoms to start | Agree | N | 36 | 7 | 14 | 5 | 17 | 79 |
|  | % | 67.9% | 70.0% | **100.0%** | **35.7%** | 70.8% | 68.7% |
| Disagree | N | 9 | 1 | 0 | 4 | 4 | 18 |
|  | % | 17.0% | 10.0% | **0.0%** | **28.6%** | 16.7% | 15.7% |
| Other | N | 8 | 2 | 0 | 5 | 3 | 18 |
|  | % | 15.1% | 20.0% | **0.0%** | **35.7%** | 12.5% | 15.7% |
| Significance (Fisher’s Exact) | ***P = 0.056*** |  |  |  |  |  |  |
| Identifying babies with later-onset SMA will lead them to grow up feeling that they are ‘different’ or already affected, despite not having symptoms yet | Agree | N | 24 | 7 | 12 | 0 | 12 | 55 |
|  | % | 45.3% | **70.0%** | **85.7%** | **0.0%** | 50.0% | 47.8% |
| Disagree | N | 14 | 0 | 0 | 7 | 8 | 29 |
|  | % | 26.4% | **0.0%** | **0.0%** | **50.0%** | 33.3% | 25.2% |
| Other | N | 15 | 3 | 2 | 7 | 4 | 31 |
|  | % | 28.3% | 30.0% | 14.3% | **50.0%** | 16.7% | 27.0% |
| Significance (Fisher’s Exact) | **P<0.001** |  |  |  |  |  |  |
| Knowing that they are likely to develop SMA later in life will prevent children from enjoying life while they are symptom-free | Agree | N | 11 | 4 | 6 | 0 | 5 | 26 |
|  | % | 20.8% | **40.0%** | **42.9%** | **0.0%** | 20.8% | 22.6% |
| Disagree | N | 28 | 3 | 4 | 11 | 16 | 62 |
|  | % | 52.8% | **30.0%** | **28.6%** | **78.6%** | **66.7%** | 53.9% |
| Other | N | 14 | 3 | 4 | 3 | 3 | 27 |
|  | % | 26.4% | 30.0% | 28.6% | 21.4% | 12.5% | 23.5% |
| Significance (Fisher’s Exact) | ***P = 0.053*** |  |  |  |  |  |  |
| Babies diagnosed with later-onset SMA will miss out on many opportunities as they grow up because of concerns over their future disability (such as not taking part in sports, or choosing not to do very physical jobs) | Agree | N | 6 | 3 | 9 | 0 | 5 | 23 |
|  | % | 11.3% | 30.0% | **64.3%** | **0.0%** | 20.8% | 20.0% |
| Disagree | N | 31 | 5 | 3 | 13 | 16 | 68 |
|  | % | 58.5% | 50.0% | **21.4%** | **92.9%** | 66.7% | 59.1% |
| Other | N | 16 | 2 | 2 | 1 | 3 | 24 |
|  | % | 30.2% | 20.0% | 14.3% | 7.1% | 12.5% | 20.9% |
| Significance (Fisher’s Exact) | **P<0.001** |  |  |  |  |  |  |
| Babies diagnosed with later-onset SMA will experience stigma and be treated differently by others as they grow up (before they have symptoms) and then into adulthood. | Agree | N | 1 | 3 | 6 | 0 | 2 | 12 |
|  | % | 1.9% | **30.0%** | **42.9%** | 0.0% | 8.3% | 10.4% |
| Disagree | N | 35 | 4 | 5 | 13 | 15 | 72 |
|  | % | 66.0% | **40.0%** | **35.7%** | 92.9% | 62.5% | 62.6% |
| Other | N | 17 | 3 | 3 | 1 | 7 | 31 |
|  | % | 32.1% | 30.0% | 21.4% | 7.1% | 29.2% | 27.0% |
| Significance (Fisher’s Exact) | **P<0.001** |  |  |  |  |  |  |
| It would be better to diagnose people with later-onset SMA when their symptoms start (current situation) to avoid them worrying about it while they are symptom free | Agree | N | 9 | 6 | 6 | 1 | 5 | 27 |
|  | % | 17.0% | **60.0%** | **42.9%** | 7.1% | 20.8% | 23.5% |
| Disagree | N | 34 | 3 | 5 | 12 | 12 | 66 |
|  | % | 64.2% | **30.0%** | **35.7%** | 85.7% | 50.0% | 57.4% |
| Other | N | 10 | 1 | 3 | 1 | 7 | 22 |
|  | % | 18.9% | 10.0% | 21.4% | 7.1% | 29.2% | 19.1% |
| Significance (Fisher’s Exact) | **P = 0.027** |  |  |  |  |  |  |
| Diagnosing babies with later-onset SMA at birth is a good thing, because it will mean that parents know to look for any symptoms starting in childhood, which could mean that their child would then be able to access the new drug treatments | Agree | N | 46 | 6 | 9 | 14 | 21 | 96 |
|  | % | **86.8%** | 60.0% | 64.3% | **100.0%** | **87.5%** | 83.5% |
| Disagree | N | 3 | 4 | 2 | 0 | 0 | 9 |
|  | % | 5.7% | 40.0% | 14.3% | 0.0% | 0.0% | 7.8% |
| Other | N | 4 | 0 | 3 | 0 | 3 | 10 |
|  | % | 7.5% | 0.0% | 21.4% | 0.0% | 12.5% | 8.7% |
| Significance (Fisher’s Exact) | **P = 0.009** |  |  |  |  |  |  |
| Parents should not be told about their baby having a later-onset condition if there is no treatment to prevent it from happening | Agree | N | 5 | 6 | 5 | 0 | 2 | 18 |
|  | % | 9.4% | **60.0%** | **35.7%** | 0.0% | 8.3% | 15.7% |
| Disagree | N | 41 | 2 | 8 | 11 | 18 | 80 |
|  | % | 77.4% | **20.0%** | **57.1%** | 78.6% | 75.0% | 69.6% |
| Other | N | 7 | 2 | 1 | 3 | 4 | 17 |
|  | % | 13.2% | 20.0% | 7.1% | 21.4% | 16.7% | 14.8% |
| Significance (Fisher’s Exact) | **P=0.002** |  |  |  |  |  |  |
| Diagnosing newborn babies with adult-onset SMA is a good thing, because treatments might become available to these children in the future | Agree | N | 46 | 3 | 6 | 13 | 20 | 88 |
|  | % | 86.8% | **30.0%** | **42.9%** | 92.9% | 83.3% | 76.5% |
| Disagree | N | 2 | 6 | 4 | 0 | 1 | 13 |
|  | % | 3.8% | **60.0%** | **28.6%** | 0.0% | 4.2% | 11.3% |
| Other | N | 5 | 1 | 4 | 1 | 3 | 14 |
|  | % | 9.4% | 10.0% | 28.6% | 7.1% | 12.5% | 12.2% |
| Significance (Fisher’s Exact) | **P<0.001** |  |  |  |  |  |  |
| Parents should not be told at birth that their baby could develop SMA later in childhood or as an adult, it should be the child's choice whether to have this information when they are old enough to understand | Agree | N | 3 | 6 | 7 | 0 | 6 | 22 |
|  | % | 5.7% | **60.0%** | **50.0%** | 0.0% | 25.0% | 19.1% |
| Disagree | N | 44 | 1 | 7 | 12 | 17 | 81 |
|  | % | 83.0% | **10.0%** | **50.0%** | 85.7% | 70.8% | 70.4% |
| Other | N | 6 | 3 | 0 | 2 | 1 | 12 |
|  | % | 11.3% | 30.0% | 0.0% | 14.3% | 4.2% | 10.4% |
| Significance (Fisher’s Exact) | **P<0.001** |  |  |  |  |  |  |
| Identifying later-onset forms of SMA at birth is a good thing, because it will save the parents or child (as an adult) searching for a diagnosis when symptoms start | Agree | N | 45 | 3 | 9 | 14 | 21 | 92 |
|  | % | 84.9% | **30.0%** | **64.3%** | **100.0%** | 87.5% | 80.0% |
| Disagree | N | 0 | 4 | 4 | 0 | 0 | 8 |
|  | % | 0.0% | **40.0%** | **28.6%** | 0.0% | 0.0% | 7.0% |
| Other | N | 8 | 3 | 1 | 0 | 3 | 15 |
|  | % | 15.1% | **30.0%** | 7.1% | **0.0%** | 12.5% | 13.0% |
| Significance (Fisher’s Exact) | **P<0.001** |  |  |  |  |  |  |
| Diagnosing newborn babies with later-onset SMA is a good thing, because it will provide useful information for medical and scientific research | Agree | N | 44 | 4 | 3 | 11 | 19 | 81 |
|  | % | 83.0% | **40.0%** | **21.4%** | 78.6% | 79.2% | 70.4% |
| Disagree | N | 2 | 5 | 4 | 1 | 1 | 13 |
|  | % | 3.8% | **50.0%** | **28.6%** | 7.1% | 4.2% | 11.3% |
| Other | N | 7 | 1 | 7 | 2 | 4 | 21 |
|  | % | 13.2% | 10.0% | **50.0%** | 14.3% | 16.7% | 18.3% |
| Significance (Fisher’s Exact) | **P<0.001** |  |  |  |  |  |  |
| I would only support parents being told that their baby will develop SMA later in childhood, or as adults, if all these babies were given access to the drug treatments | Agree | N | 15 | 7 | 9 | 0 | 8 | 39 |
|  | % | 28.8% | **70.0%** | **64.3%** | 0.0% | 33.3% | 34.2% |
| Disagree | N | 22 | 2 | 3 | 10 | 12 | 49 |
|  | % | 42.3% | **20.0%** | **21.4%** | 71.4% | 50.0% | 43.0% |
| Other | N | 15 | 1 | 2 | 4 | 4 | 26 |
|  | % | 28.8% | 10.0% | 14.3% | 28.6% | 16.7% | 22.8% |
| Significance (Fisher’s Exact) | **P = 0.005** |  |  |  |  |  |  |
| I would support parents being told that their baby is likely to develop later-onset SMA, even though many of these babies will not be eligible for the drug treatments (as they will have adult onset SMA) | Agree | N | 32 | 3 | 5 | 12 | 16 | 68 |
|  | % | 61.5% | **30.0%** | **35.7%** | 85.7% | 66.7% | 59.6% |
| Disagree | N | 6 | 6 | 5 | 0 | 3 | 20 |
|  | % | 11.5% | **60.0%** | **35.7%** | 0.0% | 12.5% | 17.5% |
| Other | N | 14 | 1 | 4 | 2 | 5 | 26 |
|  | % | 26.9% | 10.0% | **28.6%** | 14.3% | 20.8% | 22.8% |
| Significance (Fisher’s Exact) | **P<0.008** |  |  |  |  |  |  |

Fisher’s Exact significance indicated in bold and trends not reaching significance in italics.
